# Supplementary material for: A Review of Functional Motifs Utilized by Viruses
Source: PubMed Central journal article supplement (PMC5217368; doi:10.3390/proteomes4010003), 2016-01-21
Supplement: proteomes-04-00003-s001.pdf [file proteomes-04-00003-s001.pdf]

## Supplementary Materials

# A Review of Functional Motifs Utilized by Viruses

Haitham Sobhy

**Table S1.** IAP and nuclear trafficking motifs.

| Description                                                                     | Consensus Motif                                                                                                                 | Reference                                                                                                                                      |
|---------------------------------------------------------------------------------|---------------------------------------------------------------------------------------------------------------------------------|------------------------------------------------------------------------------------------------------------------------------------------------|
| <b>IAP Family Proteins-Suppressors of Apoptosis</b>                             |                                                                                                                                 |                                                                                                                                                |
| BH1, PS01080; Apoptosis regulator, Bcl-2 family BH1 motif signature (PATTERN)   | [LVMENQ][FTLS]x[GSEDECQ][GLPCKH]x{1,2}[NST][YW]G[RK][LIV][LIVC][GAT][LIVMF]{2}xF[GSAEC][GSARY]                                  | PROSITE: PS01080                                                                                                                               |
| BH2, PS01258; Apoptosis regulator, Bcl-2 family BH2 motif signature (PATTERN)   | W[LIM]x{3}[GR]G[WQ][DENSAV]x[FLGA][LIVFTC]                                                                                      | PROSITE: PS01258                                                                                                                               |
| BH3, PS01259; Apoptosis regulator, Bcl-2 family BH3 motif signature (PATTERN)   | [LIVAT]x{3}L[KARQ]x[IVAL]GD[DESG][LIMFV][DENS HQ][LVSHRQ][NSR]                                                                  | PROSITE: PS01259                                                                                                                               |
| BH4_1, PS01260; Apoptosis regulator, Bcl-2 family BH4 motif signature (PATTERN) | [DS][NT]R[AE][LI]Vx[KD][FY][LIV][GH]S[YKL]SR[Q]R[K]G[HY]x[CW]                                                                   | PROSITE: PS01260                                                                                                                               |
| LIG_BIR_II_1                                                                    | ^M{0,1}[AS]                                                                                                                     | ELME000285,<br><a href="http://elm.eu.org/elms/elmPages/LIG_BIR_II_1.html">http://elm.eu.org/elms/elmPages/LIG_BIR_II_1.html</a>               |
| LIG_BIR_III_1                                                                   | ^M{0,1}AxPx                                                                                                                     | ELME000279,<br><a href="http://elm.eu.org/elms/elmPages/LIG_BIR_II_1.html">http://elm.eu.org/elms/elmPages/LIG_BIR_II_1.html</a>               |
| LIG_BIR_III_2                                                                   | DAxPx                                                                                                                           | ELME000287,<br><a href="http://elm.eu.org/elms/elmPages/LIG_BIR_II_2.html">http://elm.eu.org/elms/elmPages/LIG_BIR_II_2.html</a>               |
| LIG_BIR_III_3                                                                   | ^M{0,1}Ax[AP]x                                                                                                                  | ELME000288,<br><a href="http://elm.eu.org/elms/elmPages/LIG_BIR_II_3.html">http://elm.eu.org/elms/elmPages/LIG_BIR_II_3.html</a>               |
| LIG_BIR_III_4                                                                   | DAxGx                                                                                                                           | ELME000293,<br><a href="http://elm.eu.org/elms/elmPages/LIG_BIR_II_4.html">http://elm.eu.org/elms/elmPages/LIG_BIR_II_4.html</a>               |
| <b>Nuclear Trafficking</b>                                                      |                                                                                                                                 |                                                                                                                                                |
| <b>Nuclear Localization Sequence</b>                                            |                                                                                                                                 |                                                                                                                                                |
| TRG-NLS_Bipartite_1                                                             | [KR][KR].{7-15}[^DE]((K[RK]) (RK))(([^DE][KR]) ([KR][^DE]))[^DE]                                                                | ELME000276,<br><a href="http://elm.eu.org/elms/elmPages/TRG_NLS_Bipartite_1.html">http://elm.eu.org/elms/elmPages/TRG_NLS_Bipartite_1.html</a> |
| TRG-NLS_MonoCore_2                                                              | [^DE]((K[RK]) (RK))[KRP][KR][^DE]                                                                                               | ELME000270,<br><a href="http://elm.eu.org/elms/elmPages/TRG_NLS_MonoCore_2.html">http://elm.eu.org/elms/elmPages/TRG_NLS_MonoCore_2.html</a>   |
| TRG-NLS_MonoExtC_3                                                              | [^DE]((K[RK]) (RK))(([^DE][KR]) ([KR][^DE]))((([PKR]) ([^DE][DE]))                                                              | ELME000278,<br><a href="http://elm.eu.org/elms/elmPages/TRG_NLS_MonoExtC_3.html">http://elm.eu.org/elms/elmPages/TRG_NLS_MonoExtC_3.html</a>   |
| <b>Nuclear Export Signal</b>                                                    |                                                                                                                                 |                                                                                                                                                |
| TRG_NES_CRM1_1                                                                  | ([DEQ].{0,1}[LIM].{2,3}[LIVMF][^P]{2,3}[LMVF].[LMIV].{0,3}[DE]) ([DE].{0,1}[LIM].{2,3}[LIVMF][^P]{2,3}[LMVF].[LMIV].{0,3}[DEQ]) | ELME000193,<br><a href="http://elm.eu.org/elms/elmPages/TRG_NES_CRM1_1.html">http://elm.eu.org/elms/elmPages/TRG_NES_CRM1_1.html</a>           |
